# Supplementary material
Source: HighWire-hosted journal article supplement (https://bmjopen.bmj.com/content/11/2/e041354)
Supplement: inline-supplementary-material-1 [file inline-supplementary-material-1.pdf]

**Supplementary Table S1.** Associations of having been vaccinated for influenza in the last 12 months with sociodemographic characteristics and health-related factors (as compared to no vaccination) in Switzerland, 2007, 2012 and 2017, overall and among people  $\geq 65$  years old. Unadjusted and adjusted odds ratios are presented (see also Table 3).

| Characteristic                          | All                    |         |                      |         | $\geq 65$ years old    |         |                      |         |
|-----------------------------------------|------------------------|---------|----------------------|---------|------------------------|---------|----------------------|---------|
|                                         | Unadjusted OR (95% CI) | P value | Adjusted OR (95% CI) | P value | Unadjusted OR (95% CI) | P value | Adjusted OR (95% CI) | P value |
| <b>Year of survey</b>                   |                        | <0.001  |                      | <0.001  |                        | <0.001  |                      | <0.001  |
| 2007                                    | 1                      |         | 1                    |         | 1                      |         | 1                    |         |
| 2012                                    | 0.84 (0.78-0.91)       |         | 0.74 (0.66-0.83)     |         | 0.68 (0.61-0.77)       |         | 0.60 (0.51-0.71)     |         |
| 2017                                    | 0.86 (0.80-0.92)       |         | 0.72 (0.64-0.80)     |         | 0.62 (0.55-0.69)       |         | 0.57 (0.49-0.66)     |         |
| <b>Age group, years</b>                 |                        | <0.001  |                      | <0.001  |                        | <0.001  |                      | <0.001  |
| 15-19                                   | 1.13 (0.88-1.46)       |         | 1.07 (0.67-1.71)     |         | -                      |         | -                    |         |
| 20-29                                   | 1                      |         | 1                    |         | -                      |         | -                    |         |
| 30-39                                   | 1.02 (0.85-1.23)       |         | 1.05 (0.77-1.44)     |         | -                      |         | -                    |         |
| 40-49                                   | 1.32 (1.11-1.58)       |         | 1.32 (0.99-1.75)     |         | -                      |         | -                    |         |
| 50-64                                   | 2.43 (2.08-2.85)       |         | 2.27 (1.74-2.96)     |         | -                      |         | -                    |         |
| 65-75                                   | 7.47 (6.38-8.74)       |         | 6.26 (4.78-8.20)     |         | 1                      |         | 1                    |         |
| >75                                     | 16.24 (13.81-19.10)    |         | 12.94 (9.81-17.08)   |         | 2.18 (1.98-2.39)       |         | 2.04 (1.82-2.30)     | <0.001  |
| <b>Sex</b>                              |                        | 0.005   |                      | 0.66    |                        | 0.50    |                      | 0.37    |
| Male                                    | 1                      |         | 1                    |         | 1                      |         | 1                    |         |
| Female                                  | 1.09 (1.03-1.16)       |         | 0.97 (0.88-1.08)     |         | 0.96 (0.88-1.06)       |         | 1.06 (0.93-1.21)     |         |
| <b>Pregnancy (current) <sup>1</sup></b> |                        | 0.80    |                      | 0.67    |                        |         |                      |         |
| Yes                                     | 0.94 (0.60-1.48)       |         | 0.91 (0.56-1.70)     |         | -                      |         | -                    |         |
| No                                      | 1                      |         | 1                    |         | -                      |         | -                    |         |
| <b>BMI group</b>                        |                        | <0.001  |                      | 0.87    |                        | 0.36    |                      | 0.93    |
| Underweight                             | 1                      |         | 1                    |         | 1                      |         | 1                    |         |
| Normal                                  | 1.00 (0.83-1.19)       |         | 0.97 (0.74-1.28)     |         | 0.82 (0.60-1.10)       |         | 0.88 (0.58-1.34)     |         |
| Overweight                              | 1.40 (1.16-1.67)       |         | 0.94 (0.72-1.25)     |         | 0.85 (0.62-1.15)       |         | 0.89 (0.59-1.36)     |         |
| Obese                                   | 1.61 (1.33-1.95)       |         | 0.99 (0.74-1.32)     |         | 0.90 (0.65-1.25)       |         | 0.91 (0.58-1.41)     |         |
| <b>Language region</b>                  |                        | <0.001  |                      | <0.001  |                        | <0.001  |                      |         |
| German-speaking                         | 1                      |         | 1                    | <0.001  | 1                      |         | 1                    | 0.01    |
| French-speaking                         | 1.19 (1.12-1.27)       |         | 1.31 (1.20-1.44)     |         | 1.26 (1.14-1.40)       |         | 1.22 (1.07-1.38)     |         |
| Italian-speaking                        | 1.13 (1.02-1.26)       |         | 0.95 (0.82-1.12)     |         | 1.23 (1.05-1.44)       |         | 1.05 (0.86-1.29)     |         |
| <b>Setting</b>                          |                        | <0.001  |                      | <0.001  |                        | <0.001  |                      | 0.017   |
| Urban                                   | 1.36 (1.26-1.46)       |         | 1.24 (1.12-1.38)     |         | 1.25 (1.12-1.40)       |         | 1.19 (1.03-1.37)     |         |

|                                                             |                  |        |                  |        |                  |        |                  |        |
|-------------------------------------------------------------|------------------|--------|------------------|--------|------------------|--------|------------------|--------|
| Rural                                                       | 1                |        | 1                |        | 1                |        | 1                |        |
| <b>Citizenship</b>                                          |                  | <0.001 |                  | 0.80   |                  | 0.38   |                  | 0.199  |
| Swiss                                                       | 1                |        | 1                |        | 1                |        | 1                |        |
| Non-Swiss                                                   | 0.70 (0.64-0.77) |        | 0.98 (0.85-1.13) |        | 0.93 (0.78-1.10) |        | 0.87 (0.70-1.08) |        |
| <b>Education level</b>                                      |                  | <0.001 |                  | <0.001 |                  | 0.079  |                  | 0.064  |
| Primary                                                     | 1                |        | 1                |        | 1                |        | 1                |        |
| Apprenticeship                                              | 0.85 (0.78-0.93) |        | 1.00 (0.88-1.14) |        | 1.01 (0.90-1.14) |        | 1.05 (0.89-1.23) |        |
| Secondary                                                   | 0.81 (0.72-0.91) |        | 1.11 (0.93-1.31) |        | 1.18 (0.99-1.41) |        | 1.14 (0.91-1.43) |        |
| Tertiary                                                    | 0.88 (0.80-0.96) |        | 1.26 (1.09-1.46) |        | 1.13 (0.98-1.29) |        | 1.26 (1.04-1.53) |        |
| <b>Smoking</b>                                              |                  | <0.001 |                  | <0.001 |                  | <0.001 |                  | 0.009  |
| Never smoked                                                | 1                |        | 1                |        | 1                |        | 1                |        |
| Former smoker                                               | 1.53 (1.43-1.64) |        | 1.17 (1.05-1.28) |        | 1.16 (1.05-1.29) |        | 1.22 (1.07-1.39) |        |
| Current smoker                                              | 0.66 (0.61-0.71) |        | 0.91 (0.81-1.02) |        | 0.89 (0.77-1.02) |        | 1.01 (0.85-1.20) |        |
| <b>Self-reported health status</b>                          |                  | <0.001 |                  | <0.001 |                  | <0.001 |                  | <0.001 |
| Very good                                                   | 1                |        | 1                |        | 1                |        | 1                |        |
| Good                                                        | 1.59 (1.48-1.72) |        | 1.16 (1.03-1.31) |        | 1.62 (1.43-1.83) |        | 1.30 (1.10-1.53) |        |
| Moderate                                                    | 3.67 (3.34-4.03) |        | 1.56 (1.36-1.80) |        | 2.48 (2.15-2.86) |        | 1.65 (1.36-2.01) |        |
| Bad                                                         | 4.54 (3.86-5.35) |        | 2.13 (1.70-2.65) |        | 3.20 (2.47-4.14) |        | 2.03 (1.46-2.81) |        |
| Very bad                                                    | 4.59 (3.19-6.59) |        | 2.07 (1.26-3.40) |        | 2.72 (1.54-4.79) |        | 1.79 (0.92-3.45) |        |
| <b>Hospital stay insurance</b>                              |                  | <0.001 |                  | <0.001 |                  | <0.001 |                  | <0.001 |
| Basic                                                       | 1                |        | 1                |        | 1                |        | 1                |        |
| Semiprivate                                                 | 1.74 (1.62-1.87) |        | 1.43 (1.30-1.59) |        | 1.31 (1.18-1.46) |        | 1.42 (1.24-1.63) |        |
| Private                                                     | 2.57 (2.33-2.82) |        | 1.78 (1.56-2.03) |        | 1.75 (1.52-2.00) |        | 1.86 (1.56-2.21) |        |
| Other                                                       | 1.09 (0.83-1.44) |        | 1.28 (0.86-1.92) |        | 0.71 (0.42-1.18) |        | 0.89 (0.50-1.58) |        |
| <b>Use of any alternative medicine therapy <sup>2</sup></b> |                  | <0.001 |                  | <0.001 |                  | <0.001 |                  | <0.001 |
| Yes                                                         | 0.83 (0.77-0.89) |        | 0.72 (0.66-0.80) |        | 0.78 (0.71-0.87) |        | 0.65 (0.57-0.75) |        |
| No                                                          | 1                |        | 1                |        | 1                |        | 1                |        |
| <b>Chronic diseases <sup>3</sup></b>                        |                  |        |                  |        |                  |        |                  |        |
| Any chronic diseases <sup>4</sup>                           | 4.38 (4.08-4.70) | <0.001 | 1.84 (1.69-2.09) | <0.001 | 2.09 (1.89-2.30) | <0.001 | 1.68 (1.51-1.88) | <0.001 |
| Diabetes                                                    | 3.69 (3.31-4.12) | <0.001 | 1.54 (1.33-1.77) | <0.001 | 1.81 (1.56-2.09) | <0.001 | 1.46 (1.23-1.73) | <0.001 |
| Lung disease                                                | 2.17 (1.86-2.53) | <0.001 | 1.81 (1.46-2.26) | <0.001 | 1.77 (1.37-2.28) | <0.001 | 1.59 (1.16-2.18) | 0.004  |
| Cerebrovascular disease                                     | 4.10 (2.99-5.61) | <0.001 | 1.12 (0.74-1.69) | 0.59   | 1.61 (1.08-2.39) | 0.02   | 0.91 (0.58-1.42) | 0.679  |
| Cardiovascular disease                                      | 3.50 (3.19-3.85) | <0.001 | 1.50 (1.34-1.68) | <0.001 | 1.67 (1.49-1.88) | <0.001 | 1.44 (1.26-1.64) | <0.001 |
| Cancer                                                      | 2.88 (2.42-3.43) | <0.001 | 1.22 (0.97-1.55) | 0.09   | 1.33 (1.06-1.67) | 0.013  |                  |        |
| <b>Medical profession <sup>5</sup></b>                      | 1.20 (1.10-1.32) | <0.001 | 1.92 (1.64-2.24) | <0.001 | -                |        | -                |        |

95% CI, 95% confidence interval; BMI, body mass index; na, not available (collinearity); OR, odds ratio

Model adjusted for all variables included in the table.

<sup>1</sup> Current pregnancy in women aged 15 to 49 years

<sup>2</sup> Use of any alternative therapy in the past 12 months (including acupuncture, traditional Chinese medicine, homeopathy, osteopathy)

<sup>3</sup> Current chronic disease versus no chronic disease (reference); lung diseases: asthma bronchiale, chronic bronchitis and emphysema vs. no lung disease (reference); diabetes: use of any diabetic drug vs. no diabetes (reference); cardiovascular disease: use of any heart medication vs. no cardiovascular disease (reference); all other diseases: self-reported disease vs. no disease (reference)

<sup>4</sup> Estimate from a separate model which included the variable “any chronic disease” instead of specific chronic diseases

<sup>5</sup> Any profession in the health care system (in the 2007 survey, the veterinary professions were also included in this category) vs. any other profession (reference)
